# Supplementary material for: Reprocessing of cross-linked polyamide networks via catalyst-free methods under moderate conditions
Source: Royal Society of Chemistry journal article supplement (doi:10.1039/d3gc03570k), 2024-01-01
Supplement: d3gc03570k1.pdf [file d3gc03570k1.pdf]

## Supporting Information

### Reprocessing of cross-linked polyamide networks via catalyst-free methods under moderate conditions

Jinshuai Zhang <sup>a, b</sup>, Yonghong Zhou <sup>b\*</sup>, Shuanhong Ma <sup>a, c\*</sup>, Feng Zhou <sup>c</sup>

<sup>a</sup> Shandong Laboratory of Advanced Materials and Green Manufacturing at Yantai, Yantai Zhongke Research Institute of Advanced Materials and Green Chemical Engineering, Yantai 264006, China

<sup>b</sup> Institute of Chemical Industry of Forest Products, Chinese Academy of Forestry, Nanjing 210042, China

<sup>c</sup> State Key Laboratory of Solid Lubrication, Lanzhou Institute of Chemical Physics, Chinese Academy of Sciences, Lanzhou 730000, China

#### Corresponding authors

\* E-mail addresses: [zyh@icifp.cn](mailto:zyh@icifp.cn) (Y. Zhou); [mashuanhong@licp.cas.cn](mailto:mashuanhong@licp.cas.cn) (S. Ma).

## Table of Contents

|                                                                                                  |    |
|--------------------------------------------------------------------------------------------------|----|
| 1. Materials and Characterizations .....                                                         | 3  |
| 1.1. Materials.....                                                                              | 3  |
| 1.2. Characterizations .....                                                                     | 3  |
| 2. Synthesis of LMW model compounds .....                                                        | 5  |
| 3. Supplement Figures and Tables .....                                                           | 6  |
| 3.1. FT-IR spectrum, <sup>1</sup> H NMR spectrum, and ESI-MS spectrum of compound <b>1</b> ..... | 6  |
| 3.2. FT-IR spectrum, <sup>1</sup> H NMR spectrum, and ESI-MS spectrum of compound <b>5</b> ..... | 8  |
| 3.3. FT-IR spectrum, <sup>1</sup> H NMR spectrum, and ESI-MS spectrum of compound <b>6</b> ..... | 9  |
| 3.4. FT-IR spectrum and <sup>1</sup> H NMR spectrum of compound <b>4</b> .....                   | 11 |
| 3.5. FT-IR spectrum and <sup>1</sup> H NMR spectrum of compound <b>7</b> .....                   | 12 |
| 3.6. <sup>1</sup> H NMR spectra of compound <b>4</b> before and after heating.....               | 13 |
| 3.7. Temperature-dependent FT-IR spectra of compound <b>7</b> .....                              | 14 |
| 3.8. FT-IR spectra, <sup>1</sup> H NMR spectra, and GPC spectra of the TO, TOMA, and TMH.....    | 14 |
| 3.9. Compositions for the UV-cured TMHA samples. ....                                            | 16 |
| 3.10. Scratch-repairing curves of TMHA2 sample at different temperatures and times .....         | 17 |
| 3.11. Mechanical properties of TMHA2 after recycling.....                                        | 17 |
| References .....                                                                                 | 17 |

## 1. Materials and Characterizations

### 1.1. Materials

Tung oil (TO) was provided by Jiangsu Donghu Bioenergy Plant Plantation Co., Ltd. (Yancheng, China). Hexahydrophthalic anhydride, (HHPA, 98%), N-*tert*-butylmethylamine (TBMA, 95%), N-isopropylmethylamine (IPMA, 98%), N-ethylmethylamine (EMA, 98%), phthalic anhydride (PA, 99.5%), cyclohexanecarbonyl chloride (CHCC, 98%), cyclohexanecarboxylic acid (99.5%), 2-(*tert*-butylamino)ethyl methacrylate (TBEM, >98%), trimethylamine (99%), maleic anhydride (MA, 99%), 2-hydroxyethyl acrylate (HEA, 97%), dimethyl sulfoxide-d<sub>6</sub> (DMSO-d<sub>6</sub>, 99.9%), tetrahydrofuran (THF, 99.9%), dichloromethane (99%), ethanol (99.7%), and Darocur 1173 (97%) were purchased from Maclin Chemical Reagent Co., Ltd. Magnesium sulfate (MgSO<sub>4</sub>, 98%) was purchased from Sinopharm Chemical Reagent Co., Ltd. (China). All the reagents and solvents in the study were used without further purification.

### 1.2. Characterizations

Fourier transform infrared (FT-IR) analyses were conducted using a Nicolet iS10 IR spectrometer (Nicolet Corporation, USA), covering a scan range of 4000 to 550 cm<sup>-1</sup>. Temperature-dependent FT-IR spectra were obtained by applying a thin film onto a NaCl crystal. Typically, the time elapsed between mixing and the initial spectrum collection was less than 5 min. Following the initial calibration of the FT-IR spectra, the temperature was gradually elevated from 20 °C to 80 °C (or 100 °C/ 200 °C), in 10 °C increments, with a 5-min equilibration period at each temperature. Nuclear magnetic resonance (NMR) tests were conducted on a DRX-300 Advance NMR spectrometer (Bruker Corporation, Germany). Deuterated chloroform or dimethyl sulfoxide-d<sub>6</sub> was used as solvent. Electrospray ionization mass spectrometry (ESI-MS) was recorded on a Thermo-QE plus (USA) apparatus. Relative molecular weights: To test the samples, a high-performance liquid chromatography (HPLC) device was utilized, which consisted of Styragel HR1 and HR2 (300 mm × 7.8 mm) columns connected to a 2414 refractive index detector (Waters Corporation, USA). The columns were maintained at a temperature of 35 °C, and THF was used as the solvent with a flow rate of 1.0 mL/min. Sample solutions were prepared using THF as a solvent and collected with a concentration of 10-20 mg/mL. The relative molecular weights of the samples were determined using a calibration curve generated from polystyrene standards with molecular weights ranging from 580 to 19,600. Gel content

( $C_{\text{gel}}$ ) of the prepared samples was measured using Soxhlet extraction, as described in our previous work <sup>1</sup>. UV-curing kinetics were evaluated by tracing the intensity of the peak at 810  $\text{cm}^{-1}$  using a modified Nicolet 5700 spectrometer (Thermo-Nicolet Corporation, USA). Dynamic mechanical analysis (DMA) was conducted using a Q800 solids analyzer (TA Corporation, USA) over a temperature range of -60 °C to 180 °C, with a heating rate of 3 °C/ min and a frequency of 1 Hz. The glass transition temperature ( $T_g$ ) was determined from the peak temperature of the  $\tan \delta$  curves, while the crosslink density ( $\nu_e$ ) was calculated using the following equation <sup>2,3</sup>:

$$\nu_e = \frac{E'}{3RT} \quad (\text{Eqn. S1})$$

where  $E'$  is the storage modulus in the rubber state ( $T_g + 50$  °C was adopted in this work),  $R$  is the gas constant, and  $T$  is the absolute temperature. Thermogravimetric analysis (TGA) was conducted using an STA 409PC thermogravimetry instrument (Netzsch Corporation, Germany) over a temperature range of 40 °C to 600 °C, with a heating rate of 10 °C/ min under a nitrogen atmosphere. Differential scanning calorimetry (DSC) measurements were performed on a DSC8000 calorimeter (PerkinElmer Corporation, USA) within the temperature range of -60 °C to 180 °C, with a heating rate of 20 °C/min under a nitrogen atmosphere. To eliminate the thermal history, the second scan was utilized to determine the  $T_g$  values of the UV-cured materials. The tensile properties of the samples were measured using a UTM 4304 universal tester (Shenzhen Suns Technology Corporation, China) with a cross-head speed of 10 mm/min. For each sample, five specimens were tested to calculate the average values. The stress relaxation curves of the samples were obtained using a DMA Q800 instrument, applying a strain value of 5% in “stress relaxation” mode. Rheological measurements of the samples were performed using a HAAKE MARS II rheometer (Germany) with a 25 mm parallel plate set-up. The measurements were conducted with a fixed gap of 1.5 mm and a deformation of 1%, which fell within the linear viscoelastic region. The scratch-repairing processes of the films were investigated through the monitoring of scratch recovery using a Leica optical microscope (Germany, ICC50 W). The film was scratched to have a crack on the surface by using a razor blade, and the width of the crack was measured by using a microscope. Subsequently, the film was subjected to heating in an oven at temperatures of 80 °C, 100 °C, 140 °C, and 180 °C for various time intervals under pressure-free conditions. The self-healing efficiency was calculated by dividing the reduced scratch width by the initial scratch width of the materials. Extrusion tests were performed using a HAAKE Minilab II

micromixed extruder (Germany). The extrusion conditions were set as follows: temperature of 140 °C, time of 30 min, torque of 550 N·cm, and rotational speed of 60 rpm.

## 2. Synthesis of low-molecular-weight (LMW) model compounds

The synthesis of LMW model compounds, namely compounds **5**, **6**, and **7** (**Scheme S1**), was conducted using the same procedure as compound **1**. To synthesize compound **4**, 0.91 g (10.0 mmol) of TBMA was combined with 50 mL of dry dichloromethane along with 1.2 g (12.0 mmol, 1.2 eq) of trimethylamine. The mixture was placed under a nitrogen atmosphere and cooled using an ice bath. Then, 1.80 g (12.0 mmol, 1.2 eq) of CHCC was slowly added dropwise to the solution. After stirring at room temperature for 5 h, the mixture was cooled again to 0 °C, and 25 mL of water was added to quench the excess CHCC. Following an additional 30 min of stirring, the organic layer was separated using a separating funnel and washed three times with saturated NaHCO<sub>3</sub> solution and with distilled water until neutral. It was then dried with MgSO<sub>4</sub> and subjected to rotary evaporation to remove the dichloromethane. Finally, a transparent liquid product was obtained, yielding 1.66 g (84.2%).

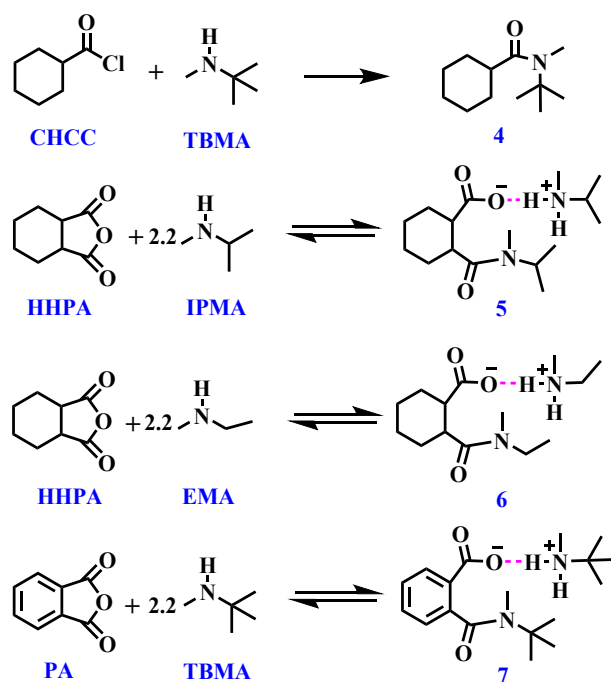

**Scheme S1.** Synthesis routes of LMW model compounds 4-7.

### 3. Supplement Figures and Tables

#### 3.1. FT-IR spectrum, $^1\text{H}$ NMR spectrum, and ESI-MS spectrum of compound 1

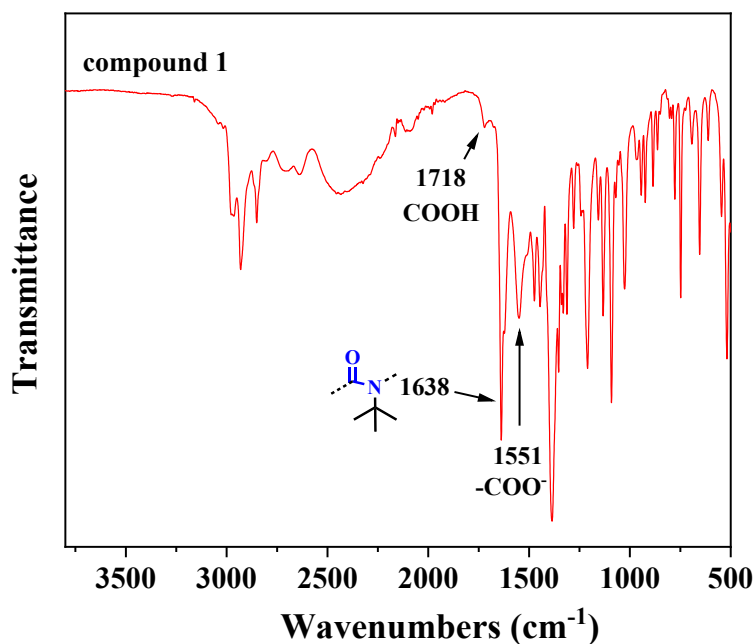

**Fig. S1.** FT-IR spectrum of compound 1 (TBMA/HHPA ratio 2.2).

In the FT-IR spectrum of compound 1, a prominent amide bond (-N-CO-) peak is evident at 1638 cm<sup>-1</sup>, while the carboxylate ion peak is observed at 1551 cm<sup>-1</sup>.<sup>4, 5</sup> It is worth noting that there are no characteristic peaks of acid anhydrides around 1860 and 1780 cm<sup>-1</sup>, indicating complete ring-opening reactions of the acid anhydride moiety.<sup>1</sup>

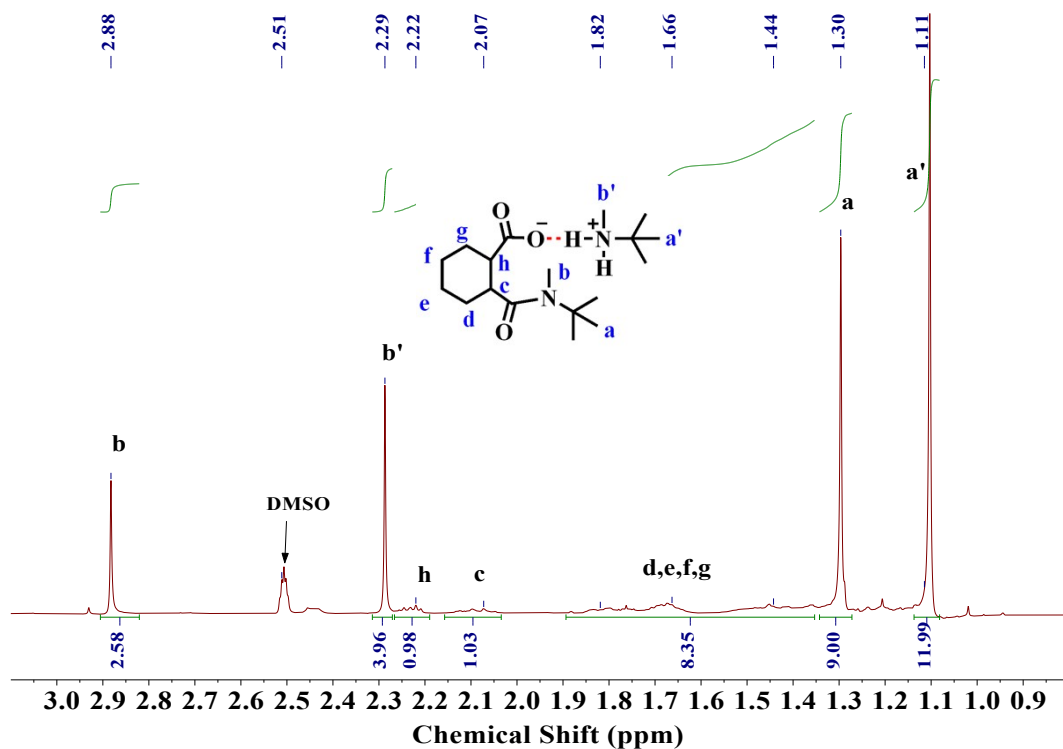

**Fig. S2.**  $^1\text{H}$  NMR spectrum of compound **1** (TBMA/HHPA ratio 2.2).

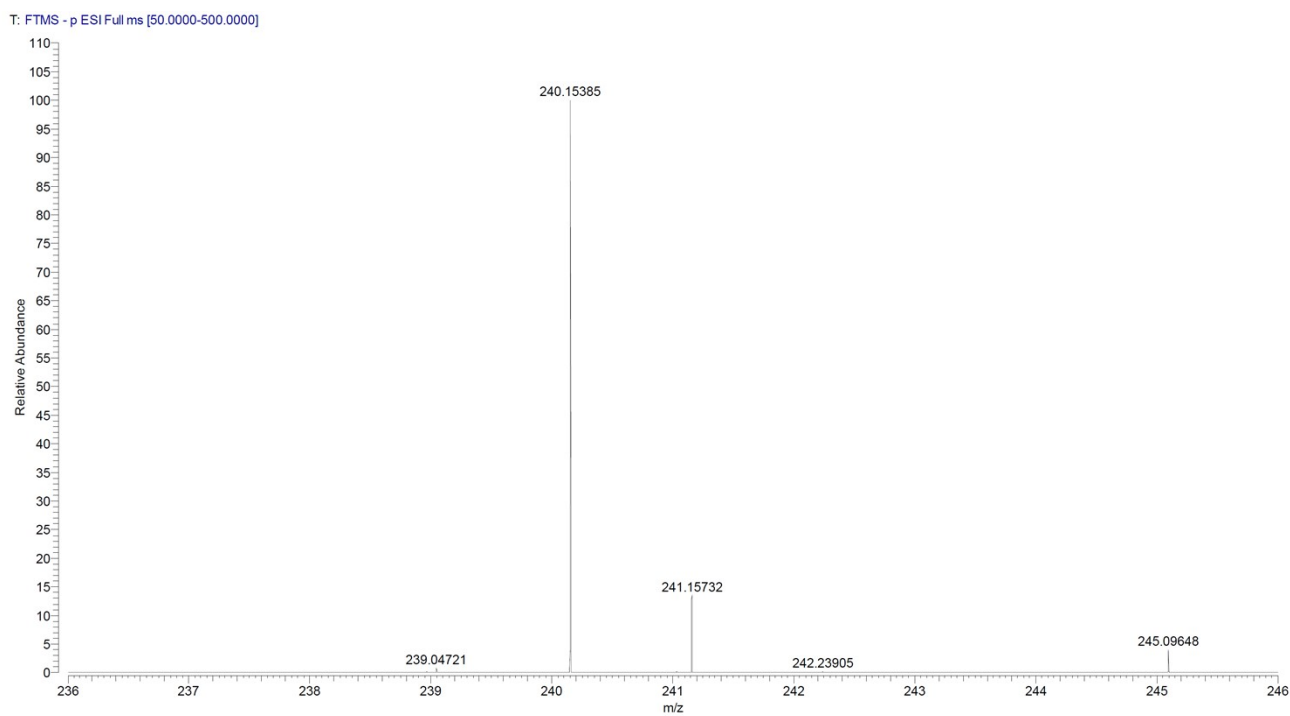

**Fig. S3.** ESI-MS spectrum of compound **1**. The mass peak with a found  $m/z$  for  $[\text{M}-\text{H}]^-$  is close to its calculated  $m/z$  of 240.32.

### 3.2. FT-IR spectrum, $^1\text{H}$ NMR spectrum, and ESI-MS spectrum of compound 5

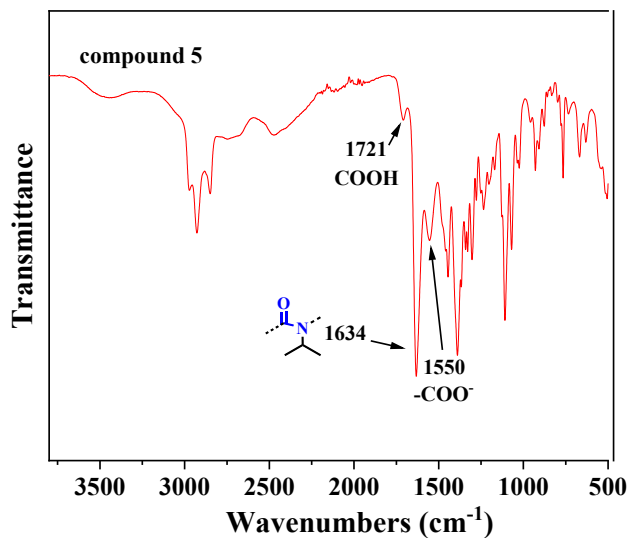

Fig. S4. FT-IR spectrum of compound 5 (IPMA/HHPA ratio 2.2).

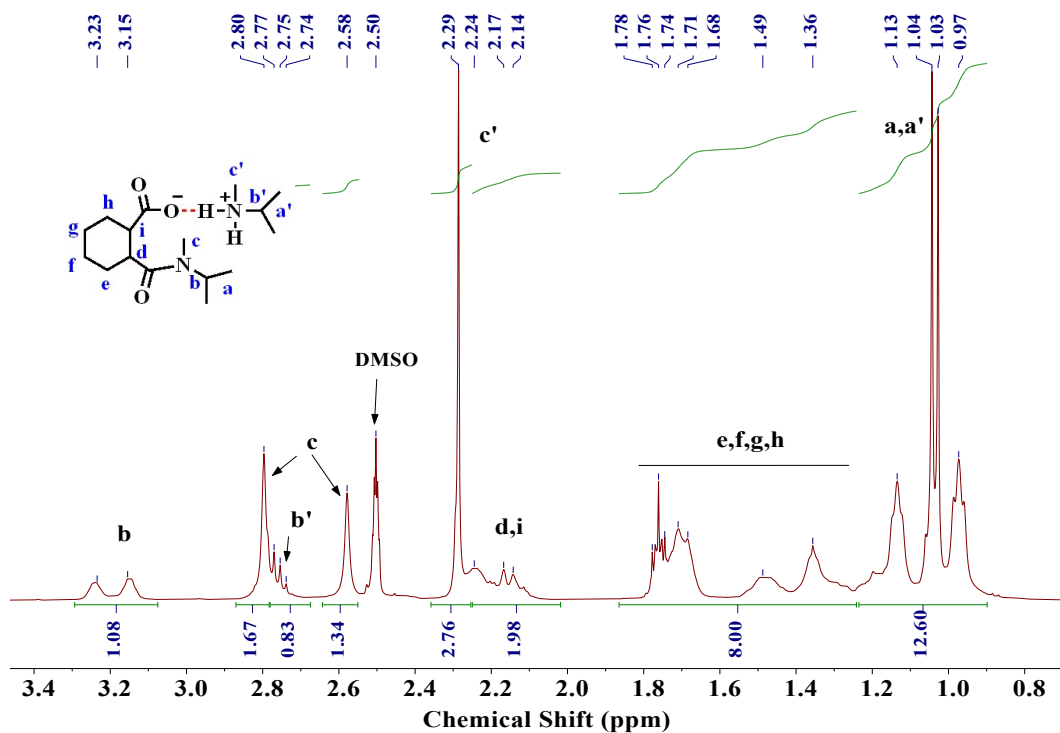

Fig. S5.  $^1\text{H}$  NMR spectrum of compound 5 (IPMA/HHPA ratio 2.2).



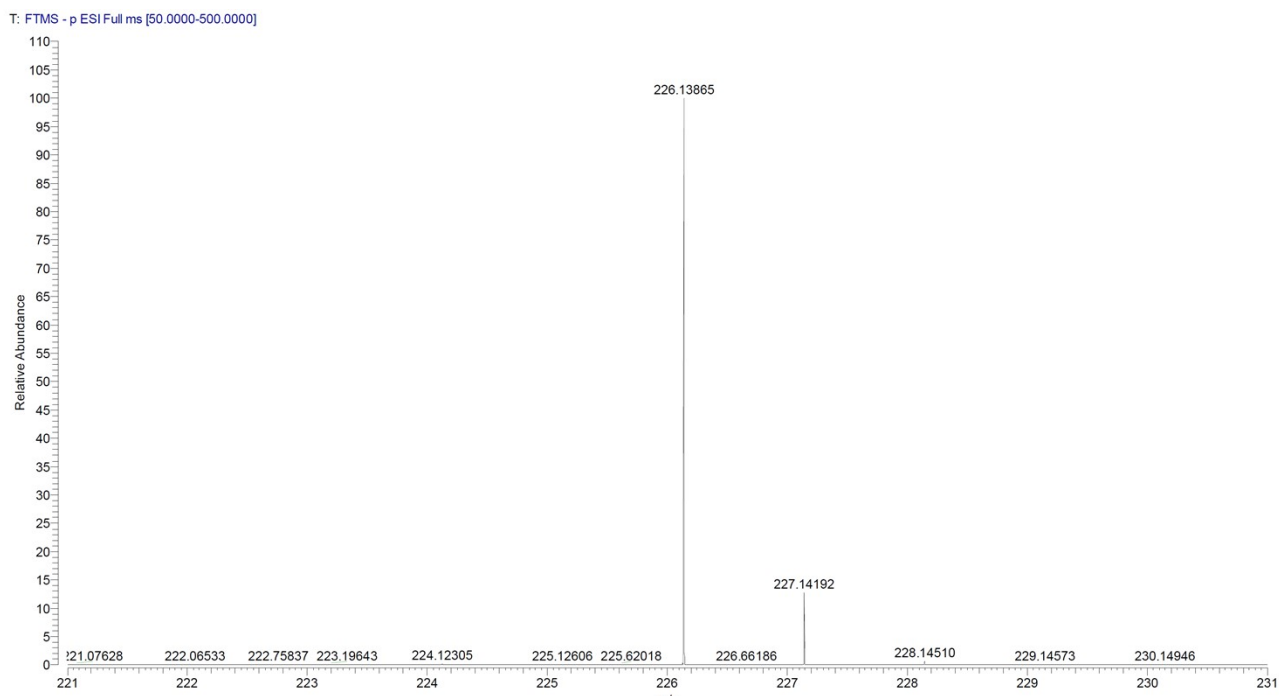

**Fig. S6.** ESI-MS spectrum of compound **5**. The mass peak with a found  $m/z$  for  $[M-H]^-$  is close to its calculated  $m/z$  of 226.40.

### 3.3. FT-IR spectrum, $^1H$ NMR spectrum, and ESI-MS spectrum of compound **6**

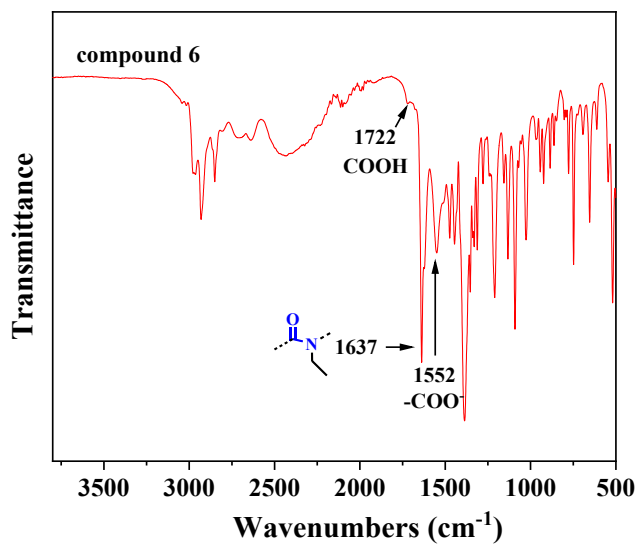

**Fig. S7.** FT-IR spectrum of compound **6** (EMA/HHPA ratio 2.2).

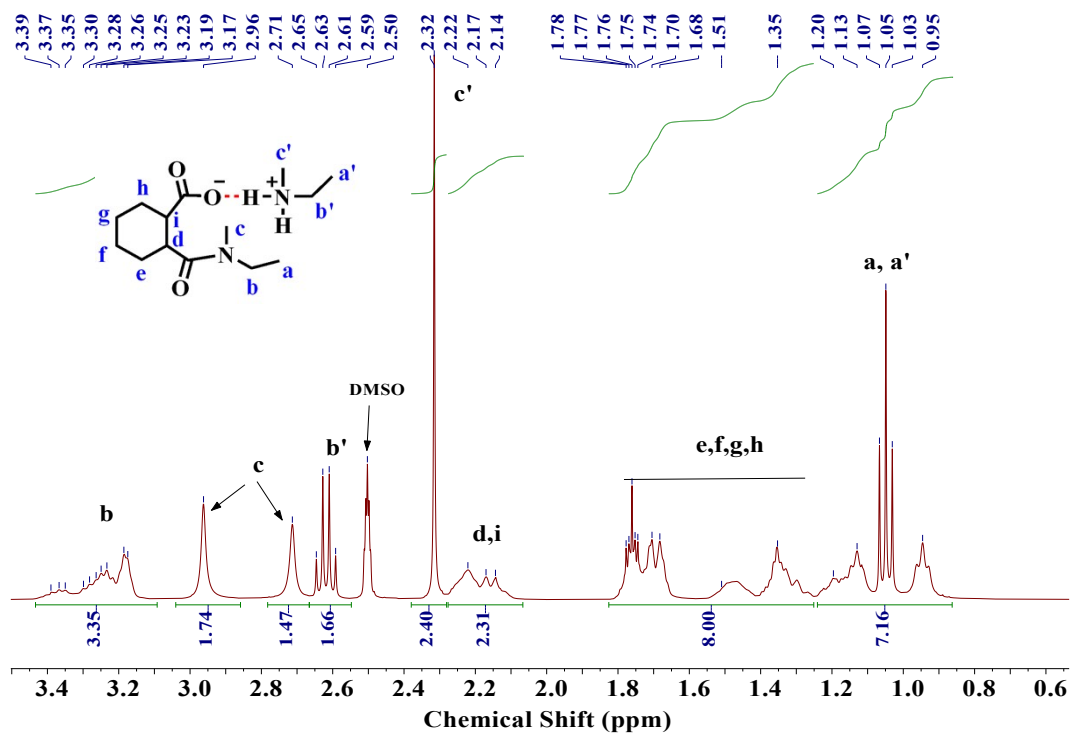

**Fig. S8.** <sup>1</sup>H NMR spectrum of compound **6** (EMA/HHPA ratio 2.2).

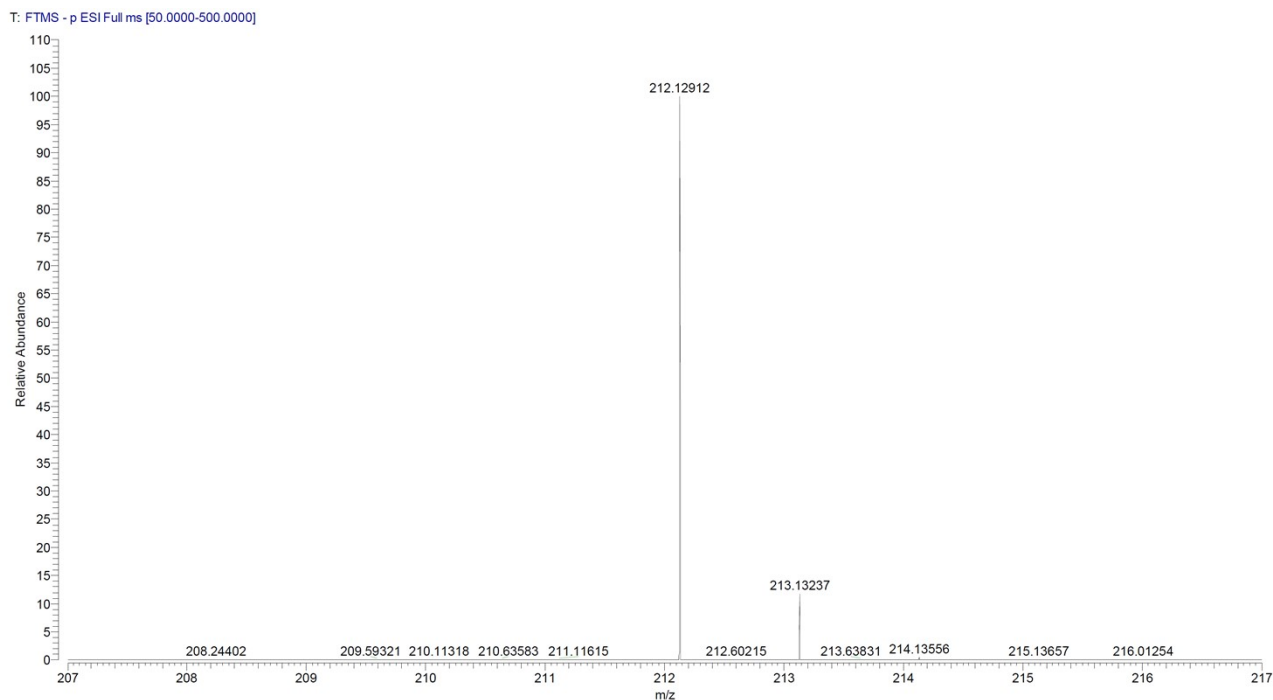

**Fig. S9.** ESI-MS spectrum of compound **6**. The mass peak with a found m/z for [M-H]<sup>-</sup> is close to its calculated m/z of 212.27.

### 3.4. FT-IR spectrum and $^1\text{H}$ NMR spectrum of compound 4

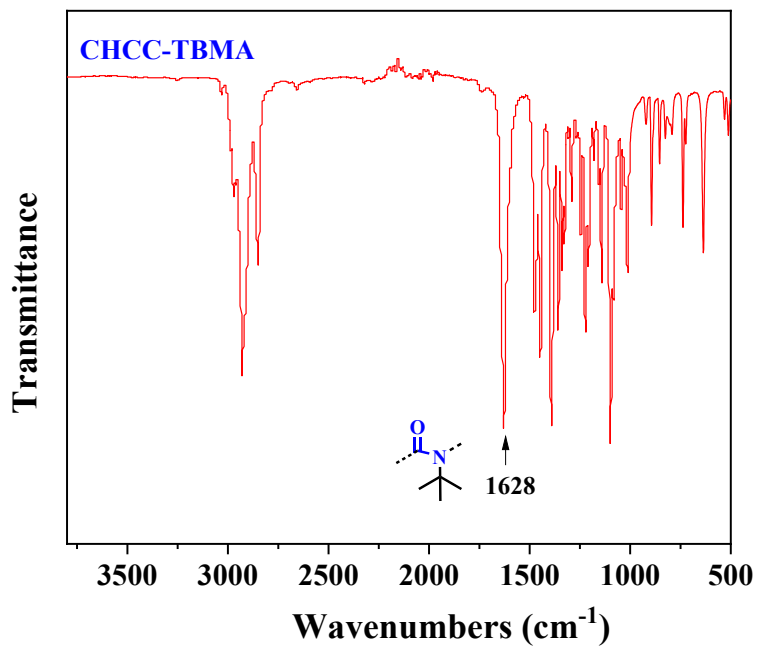

Fig. S10. FT-IR spectrum of compound 4.

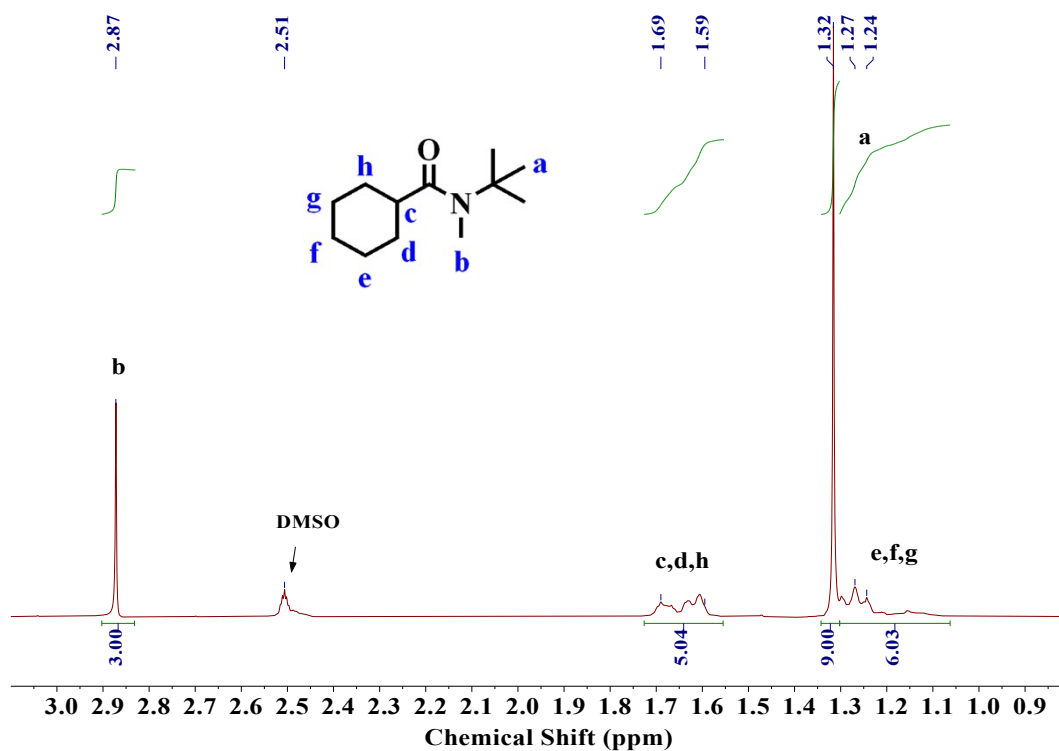

Fig. S11.  $^1\text{H}$  NMR spectrum of compound 4.

### 3.5. FT-IR spectrum and $^1\text{H}$ NMR spectrum of compound 7

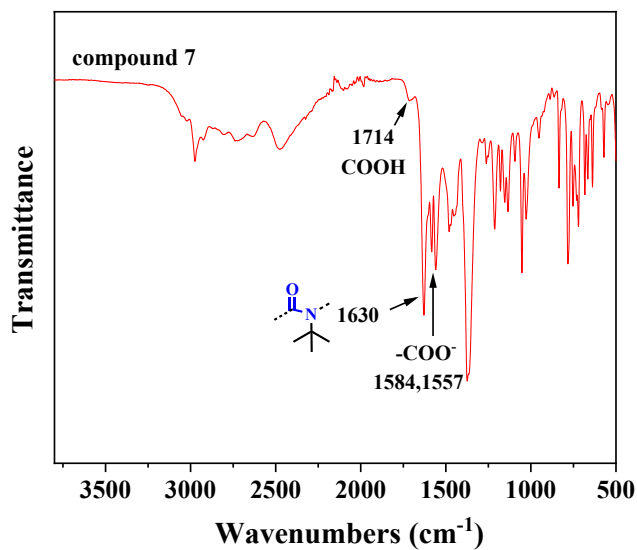

Fig. S12. FT-IR spectrum of compound 7 (TBMA/PA ratio 2.2).

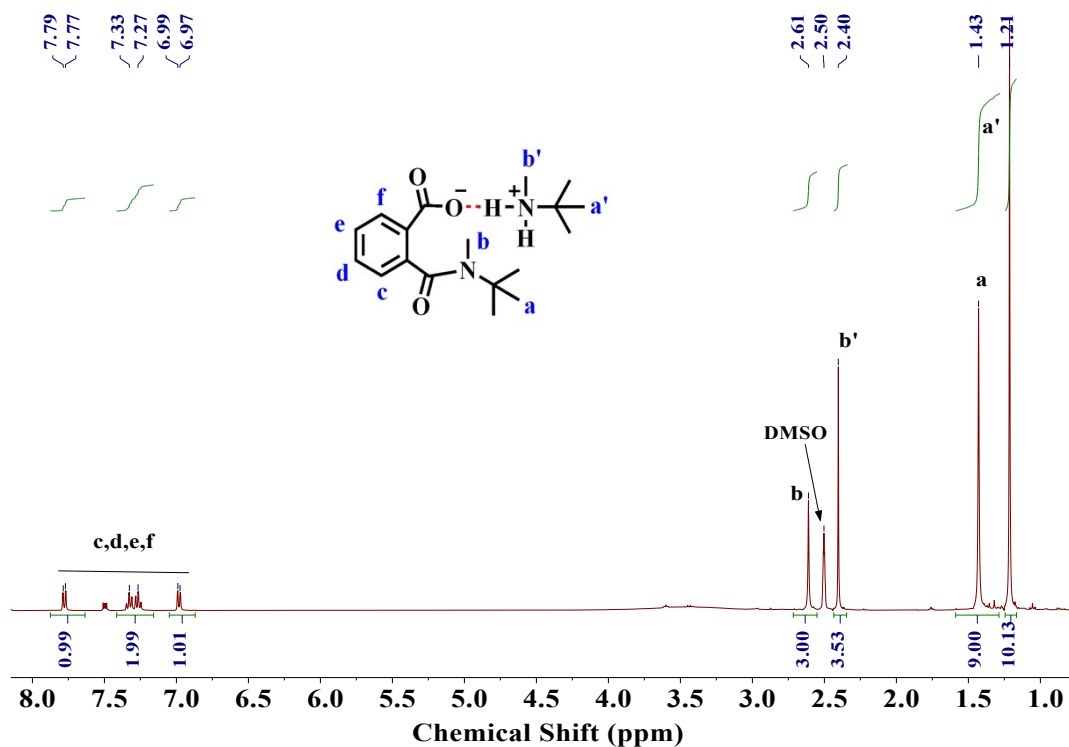

Fig. S13.  $^1\text{H}$  NMR spectrum of compound 7 (TBMA/PA ratio 2.2).

### 3.6. $^1\text{H}$ NMR spectra of compound 4 before and after heating

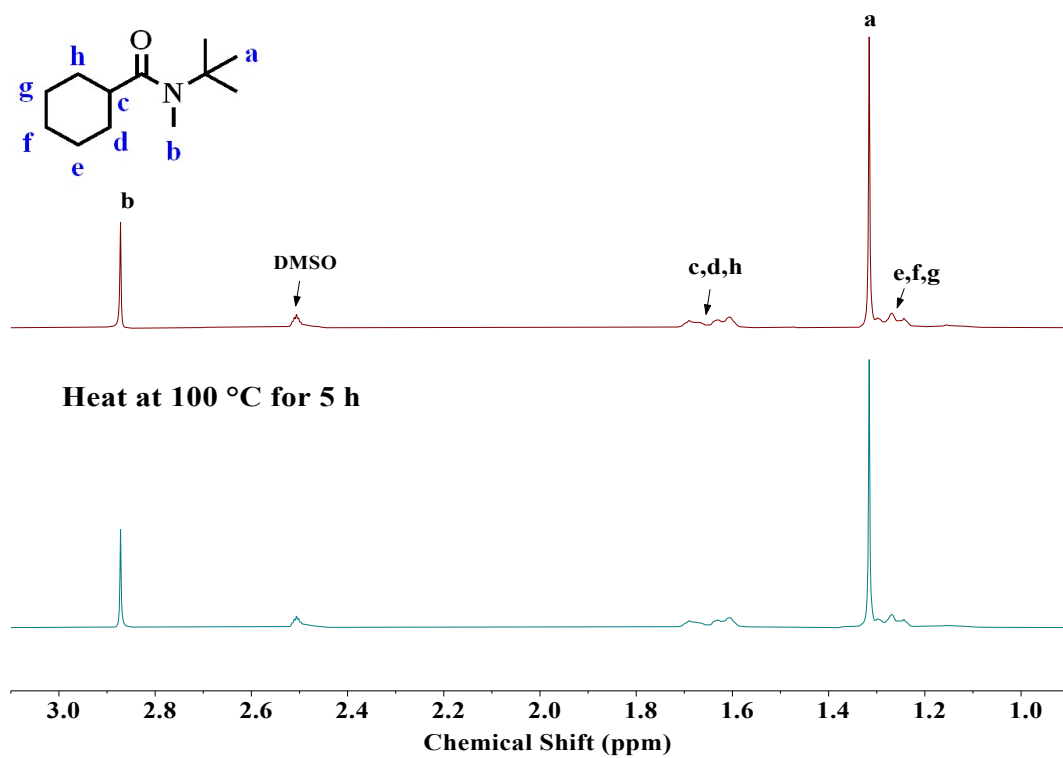

Fig. S14.  $^1\text{H}$  NMR spectra of compound 4 before and after heating.

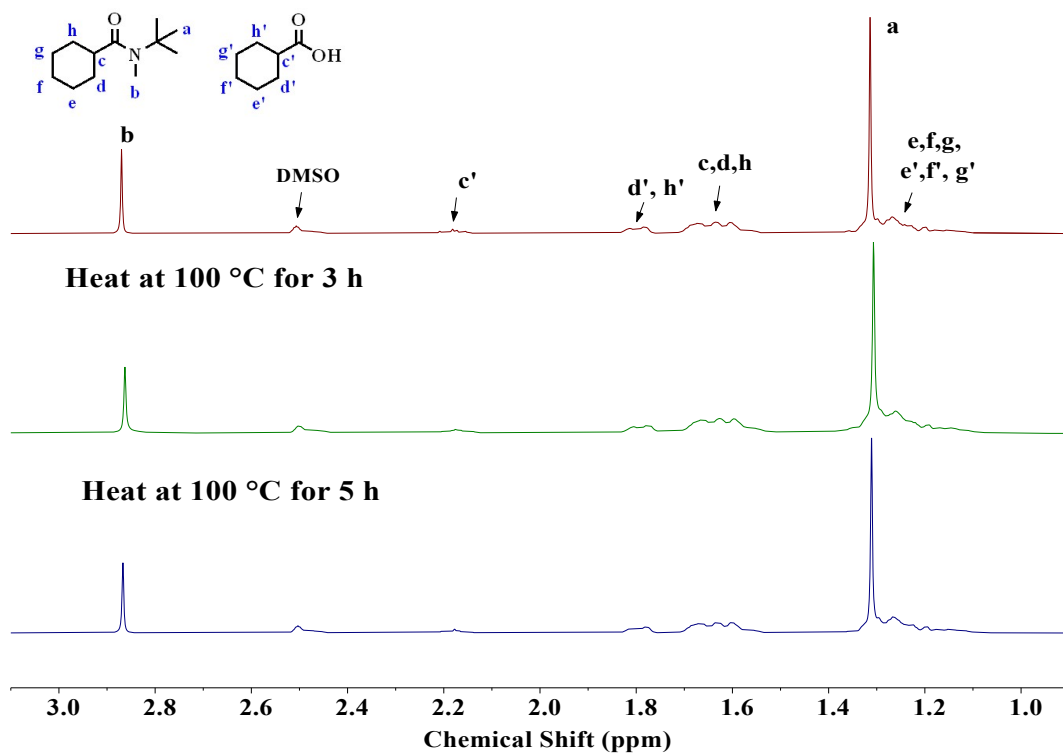

Fig. S15.  $^1\text{H}$  NMR spectra of compound 4 + cyclohexanecarboxylic acid before and after heating.

### 3.7. Temperature-dependent FT-IR spectra of compound 7

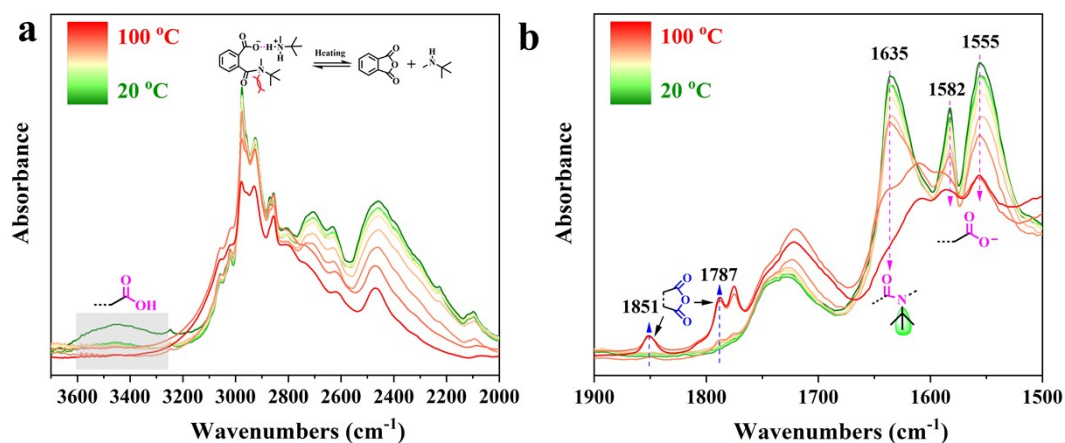

Fig. S16. Temperature-dependent FT-IR spectra of compound 7.

### 3.8. FT-IR spectra, <sup>1</sup>H NMR spectra, and GPC spectra of the TO, TOMA, and TMH

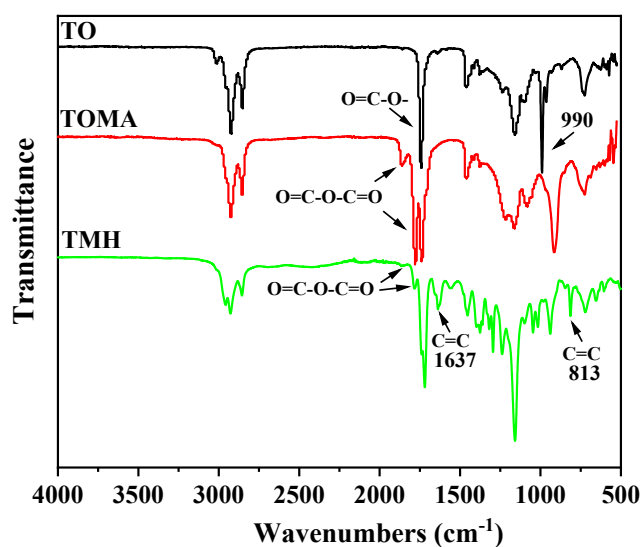

Fig. S17. FT-IR spectra of TO, TOMA, and TMH.

In the TO spectrum, the strong absorption bands at 1742 and 990  $\text{cm}^{-1}$  were assigned to the characteristic peaks of ester C=O stretching vibration and conjugated triene C=C vibration, respectively. In the TOMA spectrum, new peaks emerged at 1843 and 1778  $\text{cm}^{-1}$ , corresponding to the asymmetric stretching vibration of the O=C-O-C=O anhydride group. Additionally, the C=C absorption peak at 990  $\text{cm}^{-1}$  disappeared, indicating the occurrence of a reaction between TO-conjugated trienes and MA. In the TMH spectrum, the intensities of the peaks at 1843 and 1778  $\text{cm}^{-1}$ , corresponding to the anhydride group, significantly decreased compared to the ester peak at around 1742  $\text{cm}^{-1}$ . New peaks appeared at 1637 and 813  $\text{cm}^{-1}$ , corresponding to C=C stretching and bending vibrations, respectively.

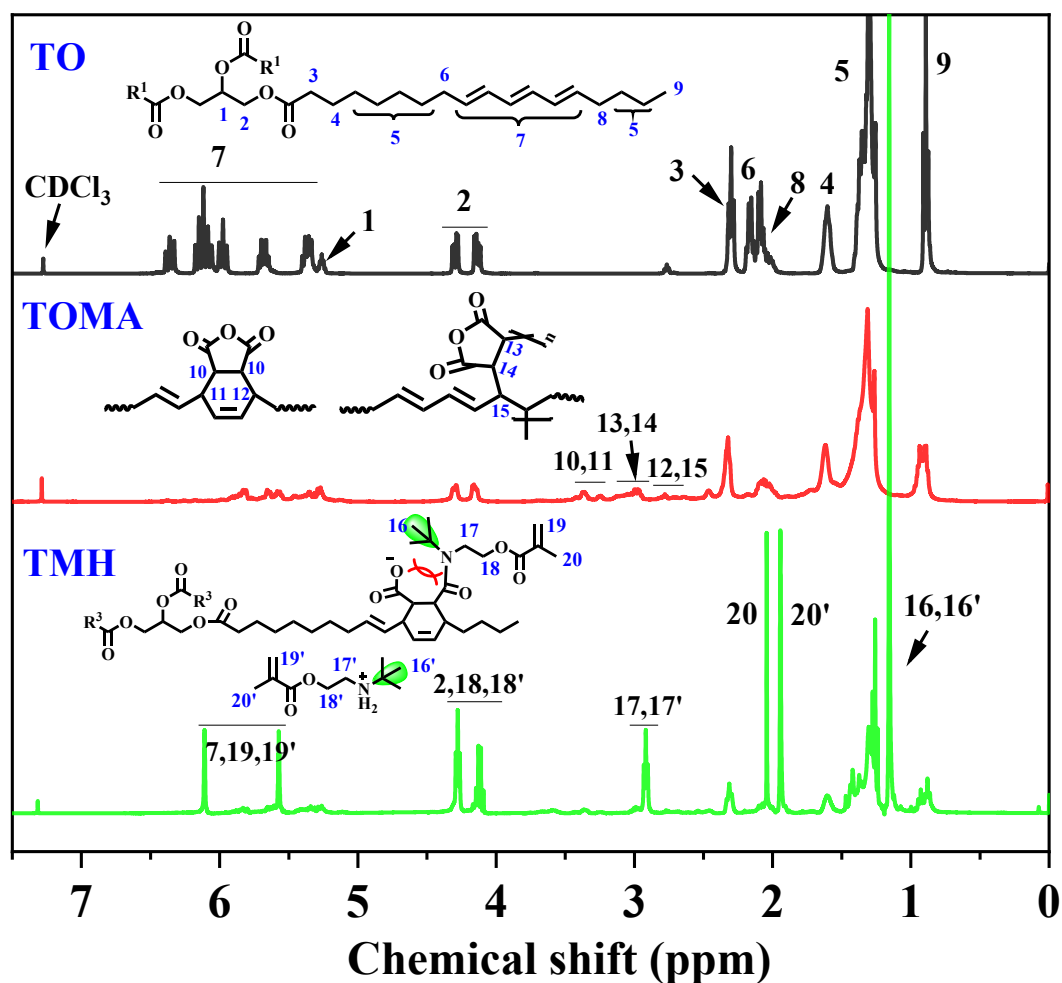

Fig. S18.  $^1\text{H}$  NMR spectra of TO, TOMA, and TMH.

In the TO spectrum, the multiple peaks in the range of 5.3-6.5 ppm were assigned to the protons of conjugated triene in TO triglycerides. However, the intensity of these peaks significantly decreased in the TOMA spectrum. Additionally, new peaks at 2.9-3.5 ppm appeared in the TOMA spectrum, corresponding to the protons on the connecting sites between TO and MA. In the TMH spectrum, the peaks in the range of 5.6-6.2 ppm were attributed to the introduced C=C protons from TBEM.

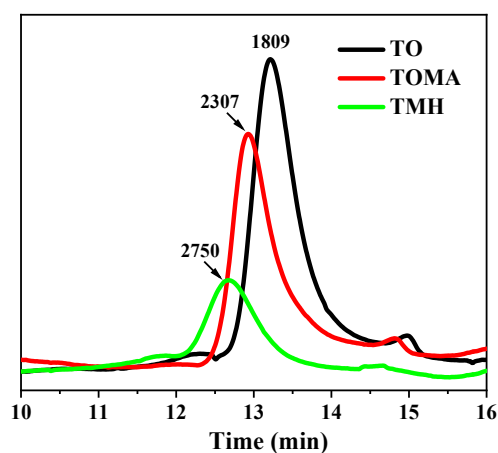

**Fig. S19.** GPC spectra of TO, TOMA, and TMH.

**Table S1.** The number-average molecular and weights weight-average of TO, TOMA, and TMH.

| Samples | $M_n$ | $M_w$ | $M_w/M_n$ |
|---------|-------|-------|-----------|
| TO      | 1566  | 1769  | 1.13      |
| TOMA    | 2029  | 2131  | 1.05      |
| TMH     | 2708  | 3067  | 1.13      |

Both products TOMA and TMH exhibited only a narrow and single peak, indicating that the synthesized products are relatively homogeneous with minimal occurrence of self-polymerization. The  $M_w$  and  $M_n$  values of TMH were significantly higher at 3067 and 2708 g/mol, respectively, compared to TOMA ( $M_w = 2131$ ,  $M_n = 2029$ ).

### 3.9. Compositions for the UV-cured TMHA samples.

**Table S2.** Compositions for the UV-cured TMHA samples.

| Samples | TMH<br>(wt %) | HEA<br>(wt %) | Darocur 1173<br>(wt %) |
|---------|---------------|---------------|------------------------|
| TMHA1   | 90            | 10            | 2                      |
| TMHA2   | 80            | 20            | 2                      |
| TMHA3   | 70            | 30            | 2                      |
| TMHA4   | 60            | 40            | 2                      |



### 3.10. Scratch-repairing curves of the TMHA2 sample at different temperatures and times

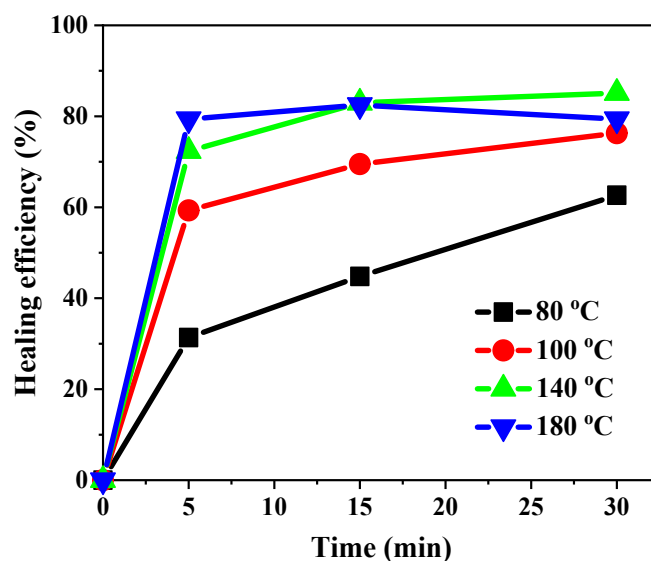

Fig. S20. Scratch-repairing curves of the TMHA2 sample at different temperatures and times.

### 3.11. Mechanical properties of TMHA2 after recycling

Table S3. Mechanical properties of TMHA2 after recycling.

| Samples | $\sigma$ (MPa) | $R_e^*$ (%) | $\varepsilon$ (%) | $R_e^*$ (%) | $E$ (MPa)        | $R_e^*$ (%) |
|---------|----------------|-------------|-------------------|-------------|------------------|-------------|
| TMHA2   | $14.8 \pm 2.2$ | -           | $80.9 \pm 11.3$   | -           | $233.2 \pm 19.7$ | -           |
| Cycle 1 | $15.1 \pm 2.4$ | 102.0       | $70.9 \pm 18.2$   | 102.7       | $239.6 \pm 27.9$ | 87.6        |
| Cycle 2 | $12.0 \pm 1.8$ | 81.1        | $60.3 \pm 11.6$   | 81.3        | $189.7 \pm 31.2$ | 74.5        |
| Cycle 3 | $10.0 \pm 0.7$ | 67.6        | $54.1 \pm 7.9$    | 44.6        | $103.9 \pm 24.6$ | 66.9        |

\* Recycling efficiency for each kind of property.

## References

1. J. Zhang, Q. Shang, Y. Hu, F. Zhang, J. Huang, J. Lu, J. Cheng, C. Liu, L. Hu, H. Miao, Y. Chen, T. Huang and Y. Zhou, *Eur. Polym. J.*, 2020, **140**, 109997.
2. C. Zhang, H. Liang, D. Liang, Z. Lin, Q. Chen, P. Feng and Q. Wang, *Angew. Chem. Int. Ed. Engl.*, 2020, **60**, 4289-4299.
3. W.-Q. Yuan, G.-L. Liu, C. Huang, Y.-D. Li and J.-B. Zeng, *Macromolecules*, 2020, **53**, 9847-9858.
4. A. Barth, *Prog. Biophys. Mol. Biol.*, 2000, **74**, 141-173.
5. Z. Yu, S. Ma, Z. Tang, Y. Liu, X. Xu, Q. Li, K. Zhang, B. Wang, S. Wang and J. Zhu, *Green Chem.*, 2021, **23**, 6566-6575.
